# Supplementary material for: Layered Potassium Titanium Niobate/Reduced Graphene Oxide Nanocomposite as a Potassium-Ion Battery Anode
Source: PubMed Central journal article supplement (PMC10628103; doi:10.1007/s40820-023-01222-2), 2023-11-06
Supplement: 40820_2023_1222_MOESM1_ESM.pdf [file 40820_2023_1222_MOESM1_ESM.pdf]

Supplementary Information for

## Layered Potassium Titanium Niobate/Reduced Graphene Oxide Nanocomposite as a Potassium-Ion Battery Anode

Charlie A. F. Nason<sup>1</sup>, Ajay Piriya Vijaya Kumar Saroja<sup>1</sup>, Yi Lu<sup>1</sup>, Runzhe Wei<sup>1</sup>, Yupei Han<sup>1</sup>, Yang Xu<sup>1</sup>, \*

<sup>1</sup> Department of Chemistry, University College London, 20 Gordon Street, London WC1H 0AJ, UK

\*Corresponding author. E-mail: [y.xu.1@ucl.ac.uk](mailto:y.xu.1@ucl.ac.uk) (Yang Xu)

### Supplementary Figures and Tables

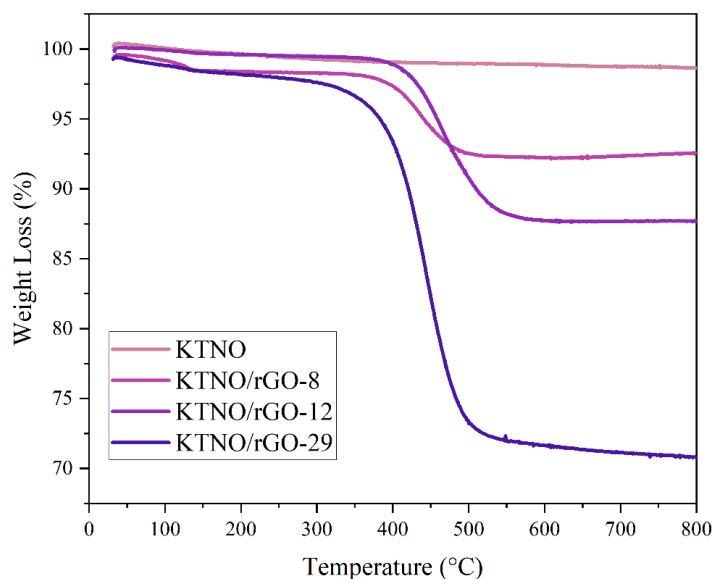

**Fig. S1** TGA results of KTNO/rGO-8, KTNO/rGO-12 and KTNO/rGO-29

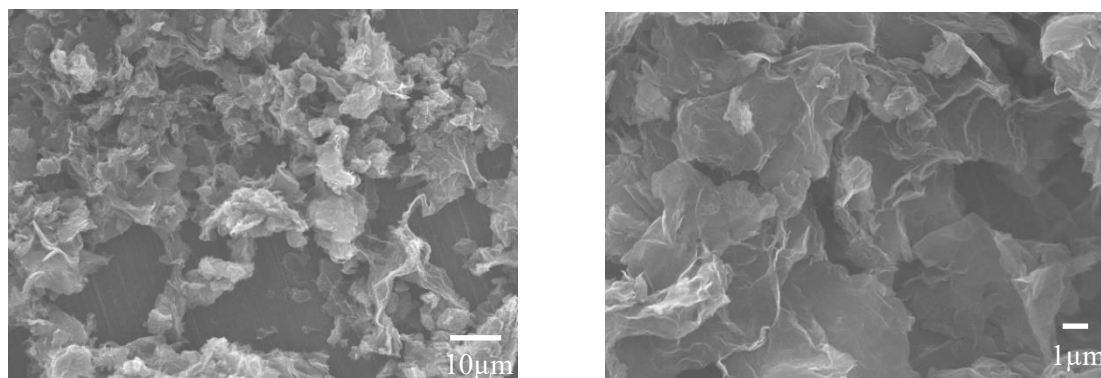

**Fig. S2** SEM images of rGO

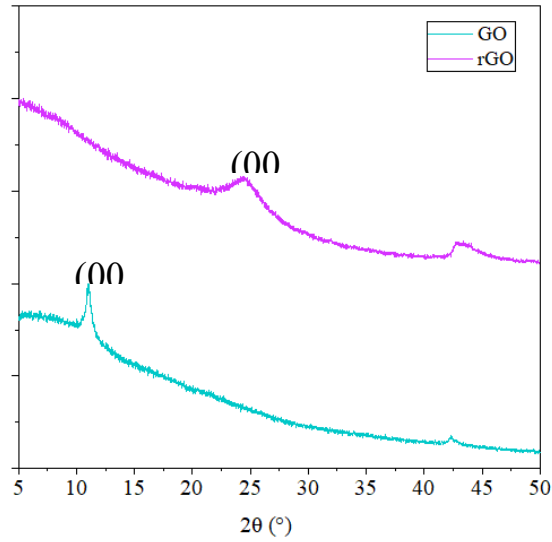

Fig. S3 XRD pattern of GO and rGO

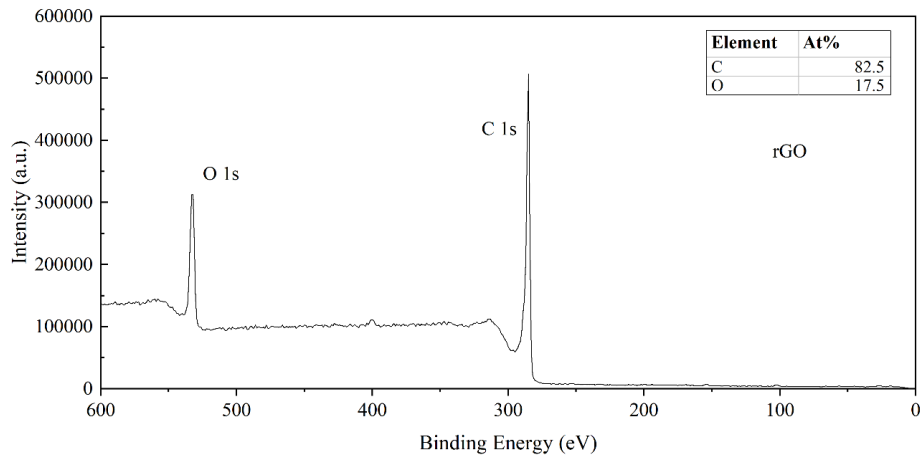

Fig. S4 XPS survey spectra of rGO

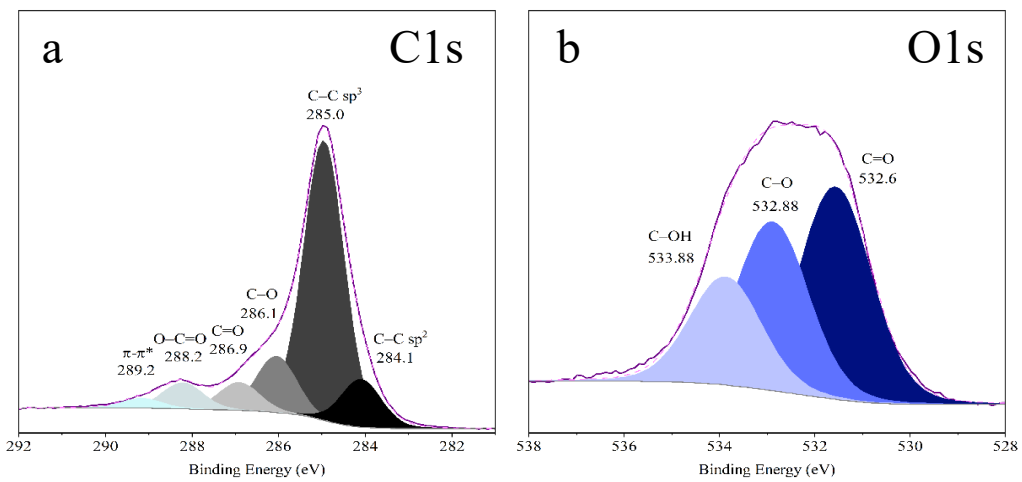

Fig. S5 High resolution XPS spectra of rGO. a C 1s b O 1s

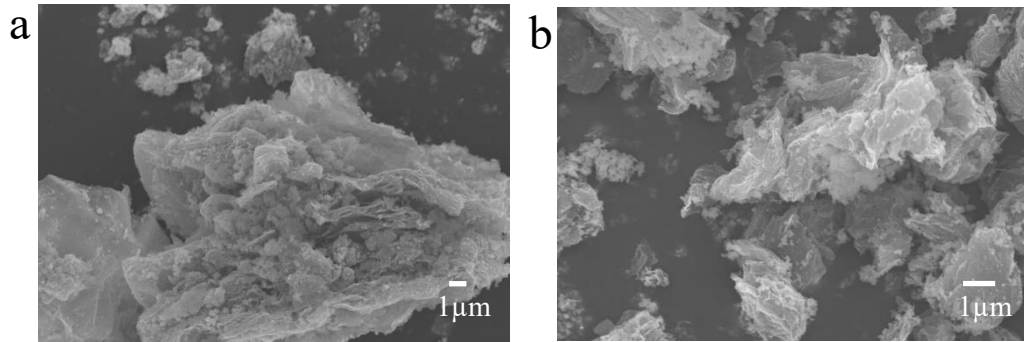

**Fig. S6** SEM images of **a** KTNO/rGO-8. **b** KTNO/rGO-29

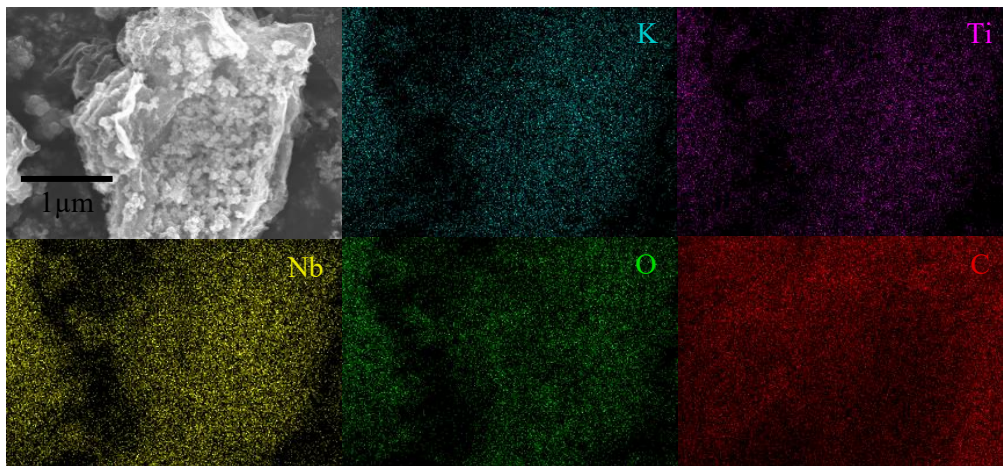

**Fig. S7** EDS mapping of KTNO/rGO-8

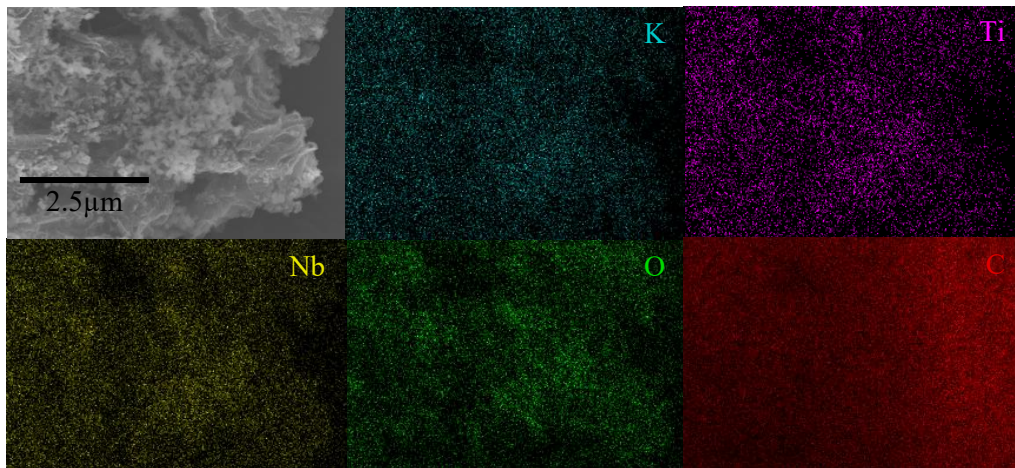

**Fig. S8** EDS mapping of KTNO/rGO-29

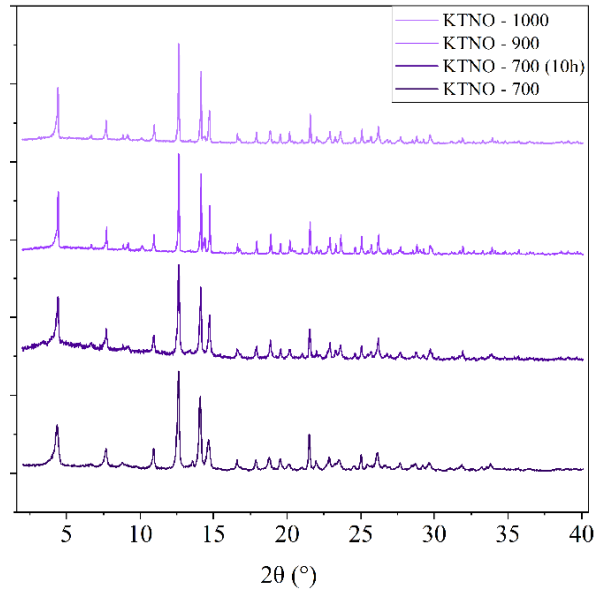

Fig. S9 XRD patterns of KTNO-700, KTNO-700-10h, KTNO-900 and KTNO-1000

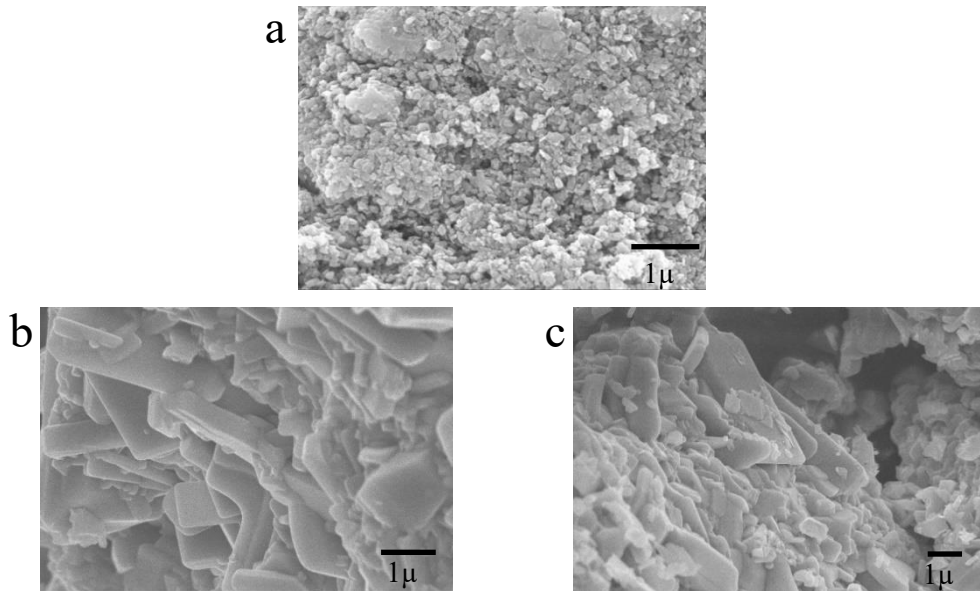

Fig. S10 SEM images of a KTNO-700. b KTNO-900. c KTNO-1000

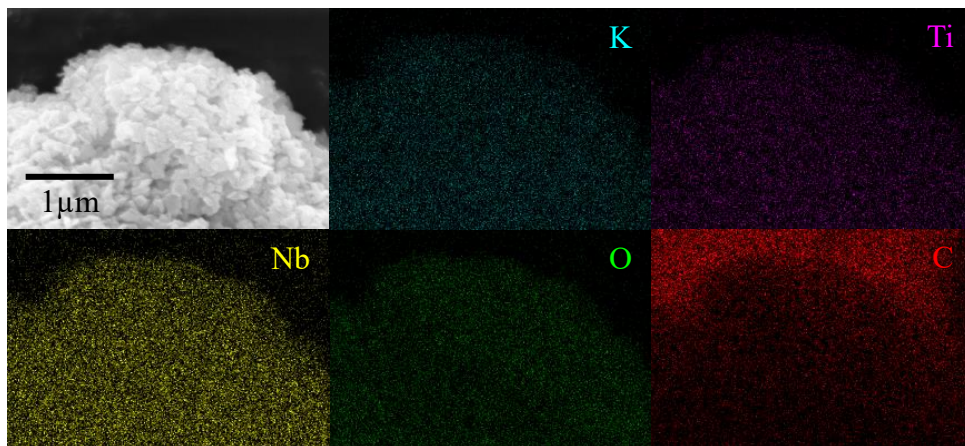

Fig. S11 EDS mapping of KTNO

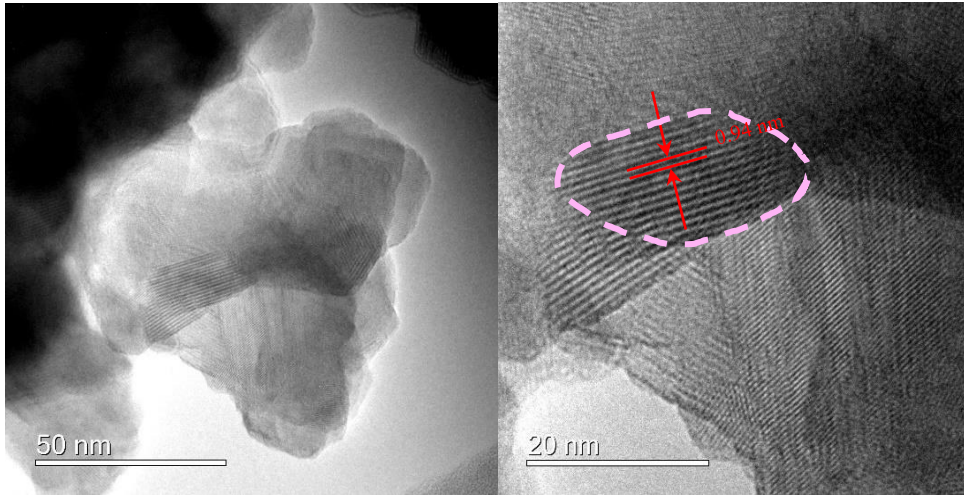

**Fig. S12** TEM and HRTEM image of KTNO

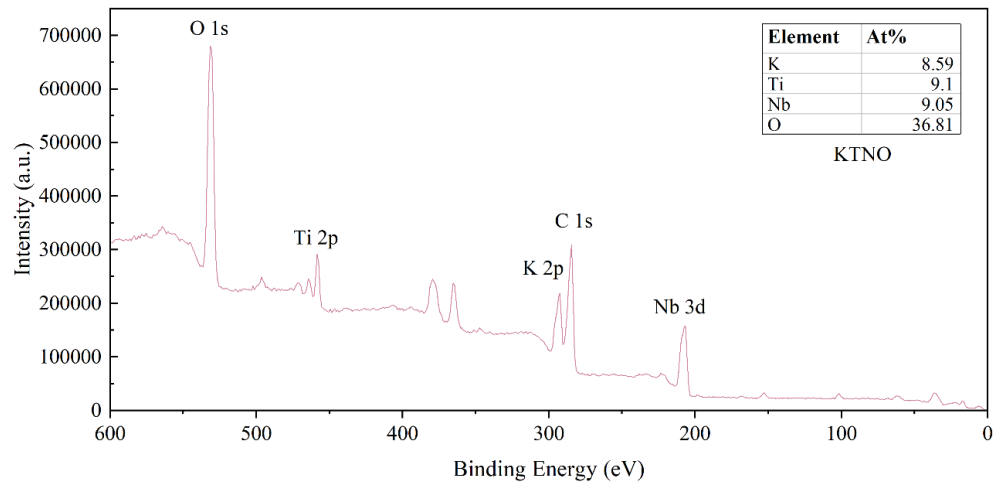

**Fig. S13** XPS survey spectra of KTNO

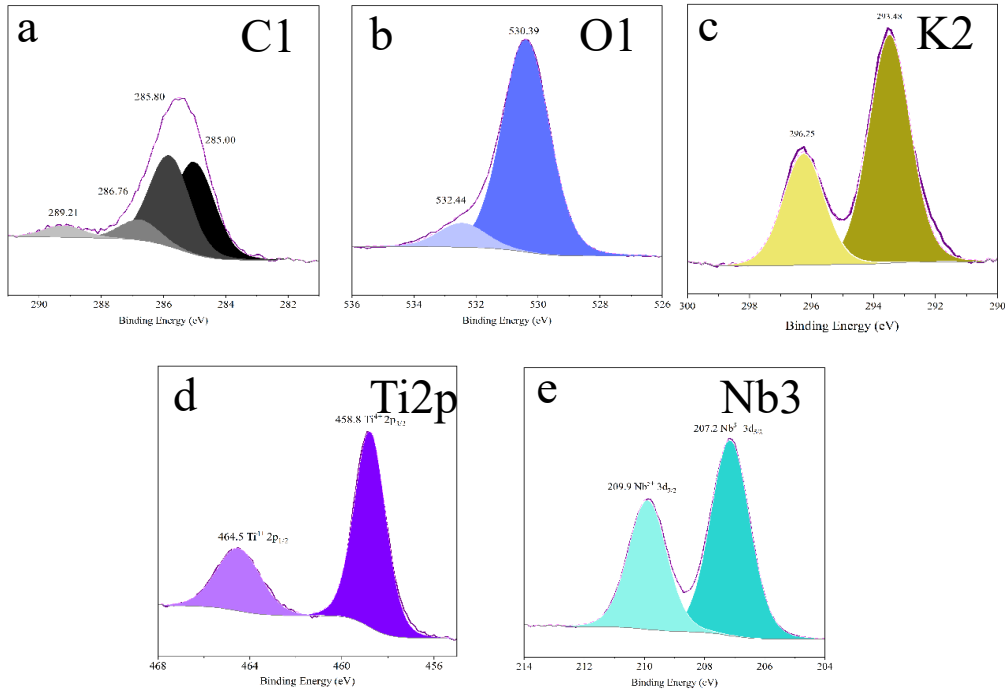

**Fig. S14** High resolution XPS spectra of KTNO **a** C1s. **b** O1s. **c** K2p. **d** Ti. **e** Nb

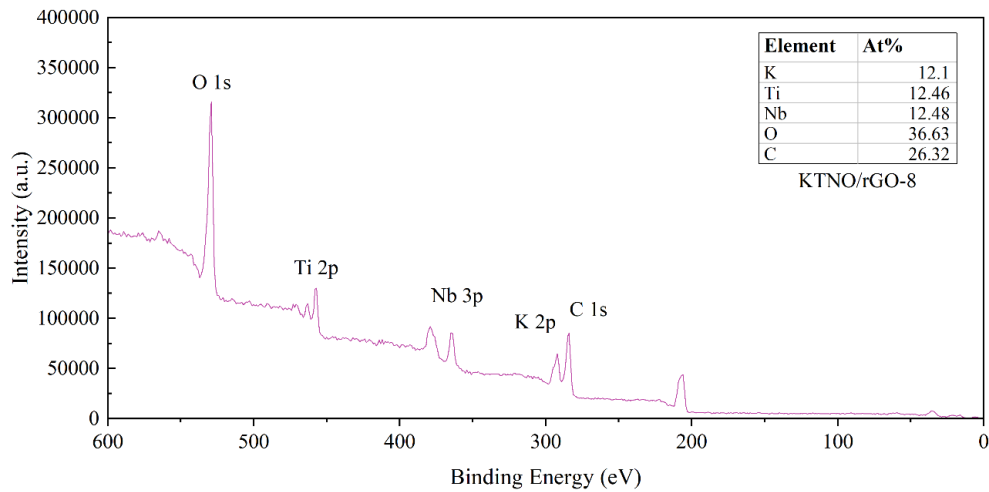

**Fig. S15** XPS survey spectra of KTNO/rGO-8

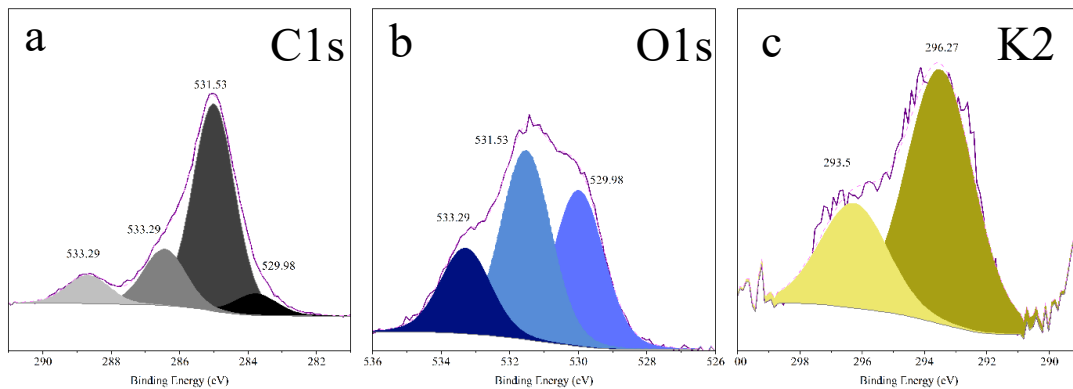

**Fig. S16** High resolution XPS spectra of KTNO/rGO-12 **a** C1s. **b** O1s. **c** K2p

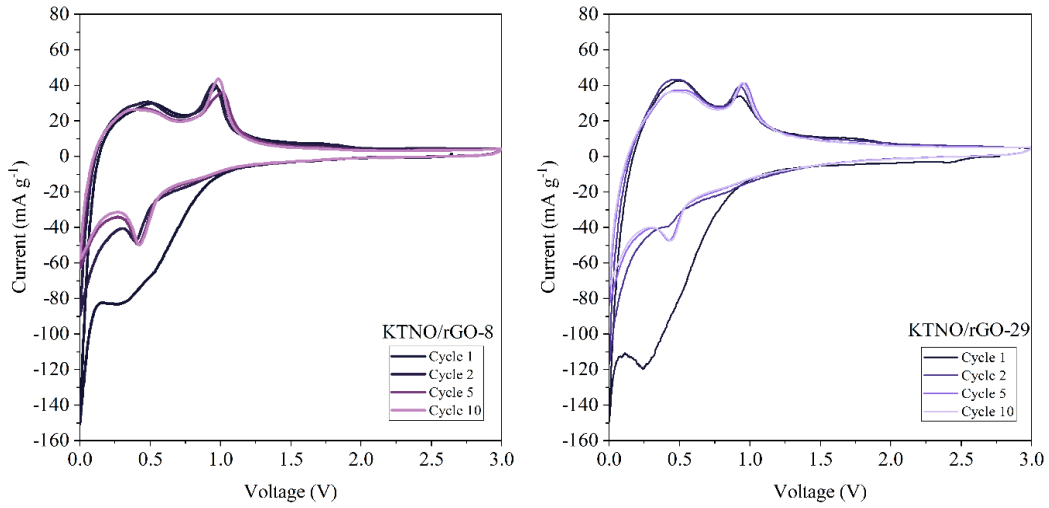

**Fig. S17** CV curves for KTNO/rGO-8 and KTNO/rGO-29

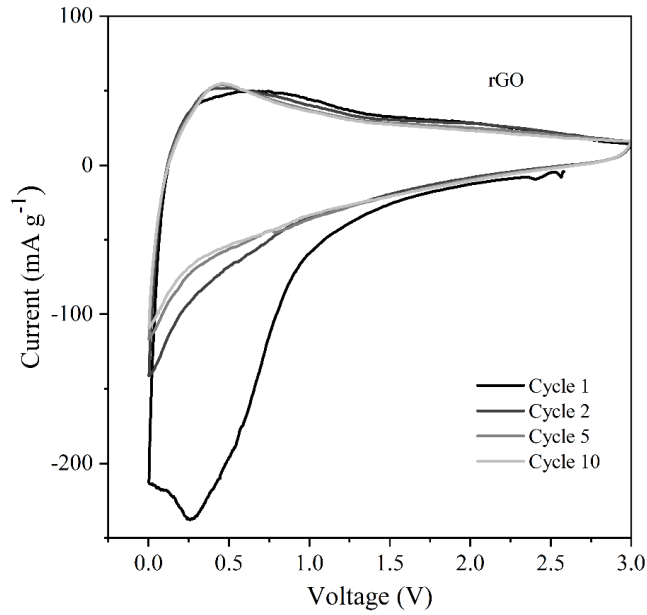

**Fig. S18** CV curves for rGO

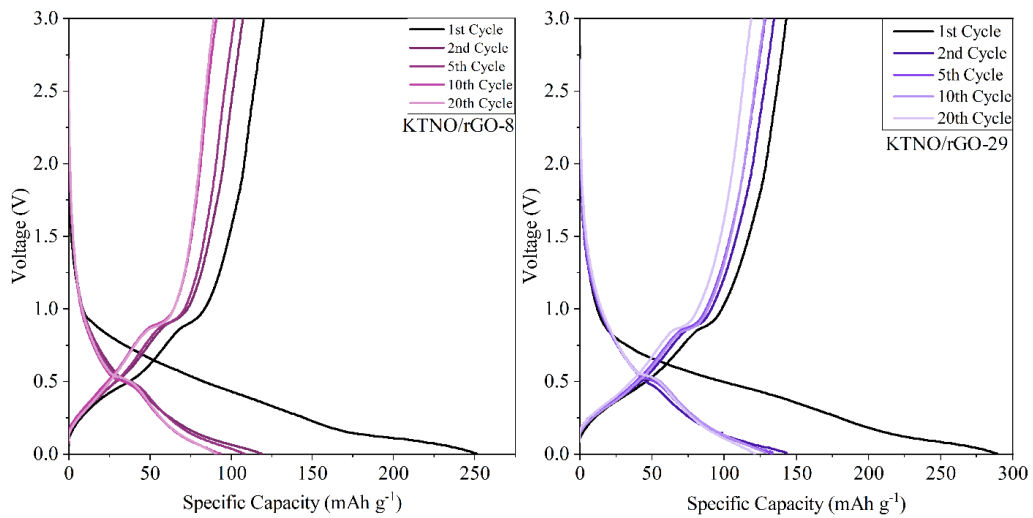

**Fig. S19** Galvanostatic charge-discharge curves of KTNO/rGO-8 and KTNO/rGO-29 at  $20 \text{ mA g}^{-1}$

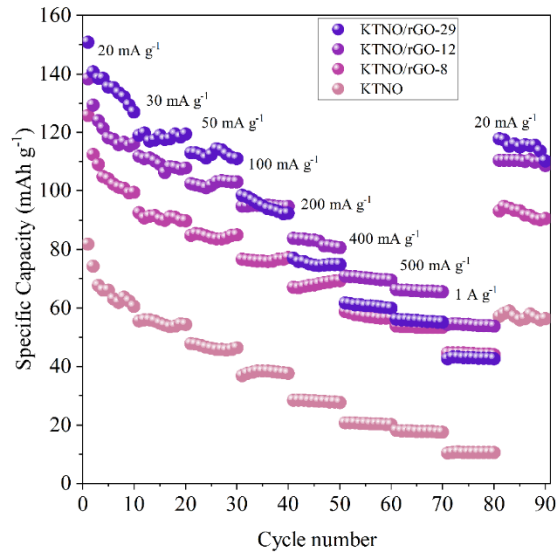

**Fig. S20** Rate performance of KTNO, KTNO/rGO-8, KTNO/rGO-12 and KTNO/rGO-29

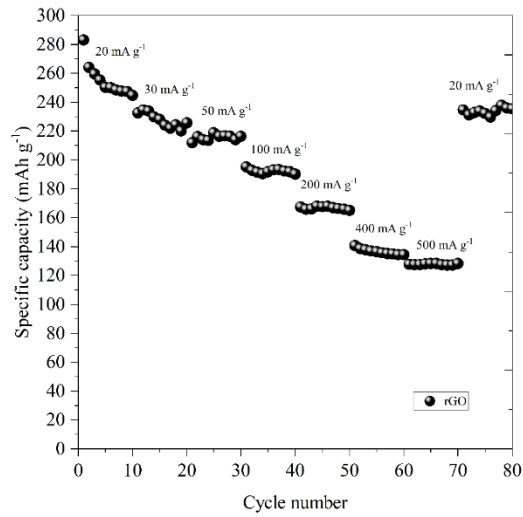

**Fig. S21** Rate performance of rGO

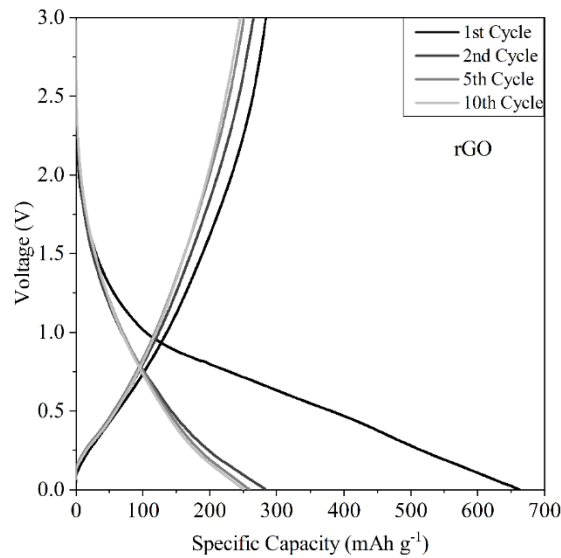

**Fig. S22** GCD curves of rGO



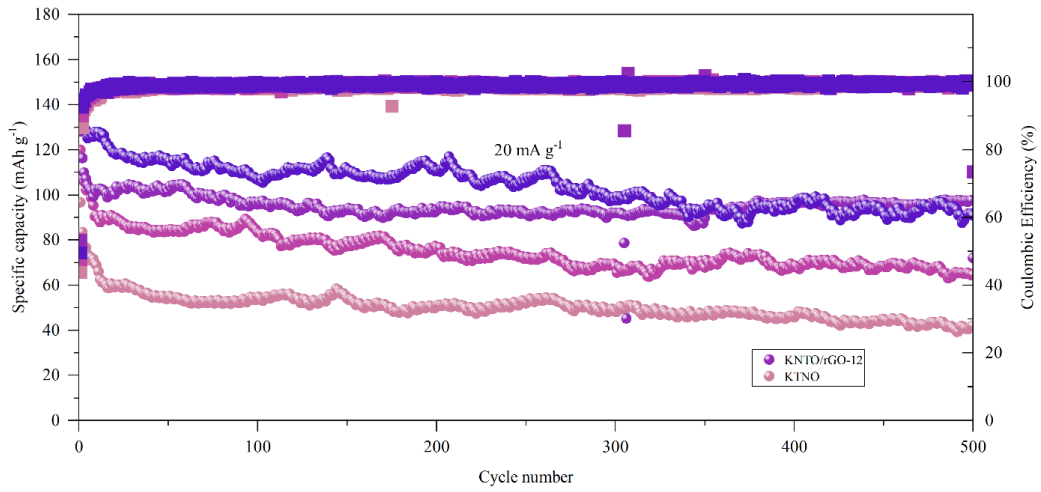

**Fig. S23** Cycling performance of KTNO/rGO and KTNO

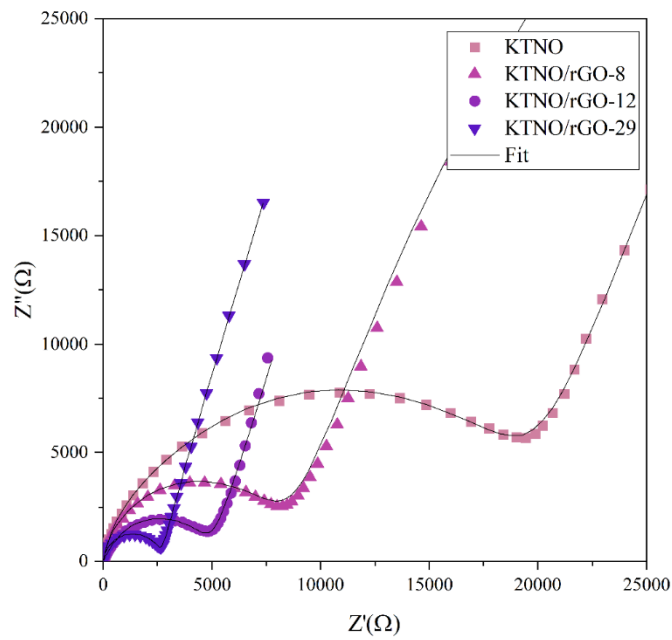

**Fig. S24** EIS results for KTNO and the nanocomposites KTNO/rGO-8, KTNO/rGO-12 and KTNO/rGO-29

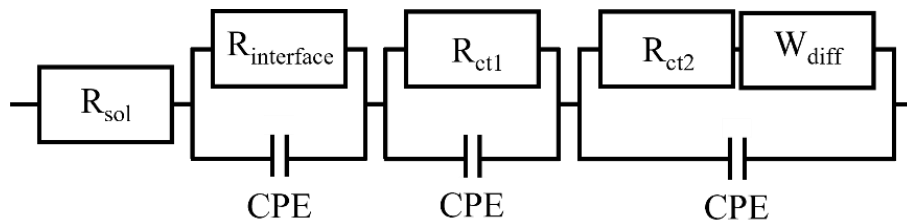

**Fig. S25** Equivalent circuit used for fitting.

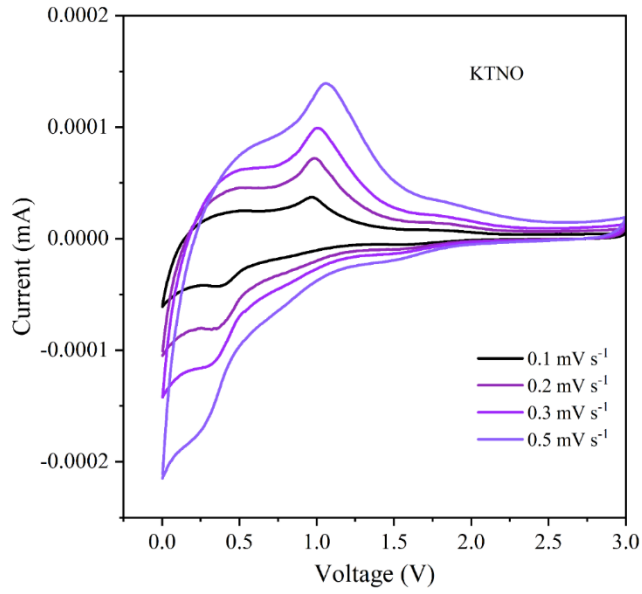

Fig. S26 CV curves of KTNO at scan rates from 0.1 – 0.5 mV s<sup>-1</sup>

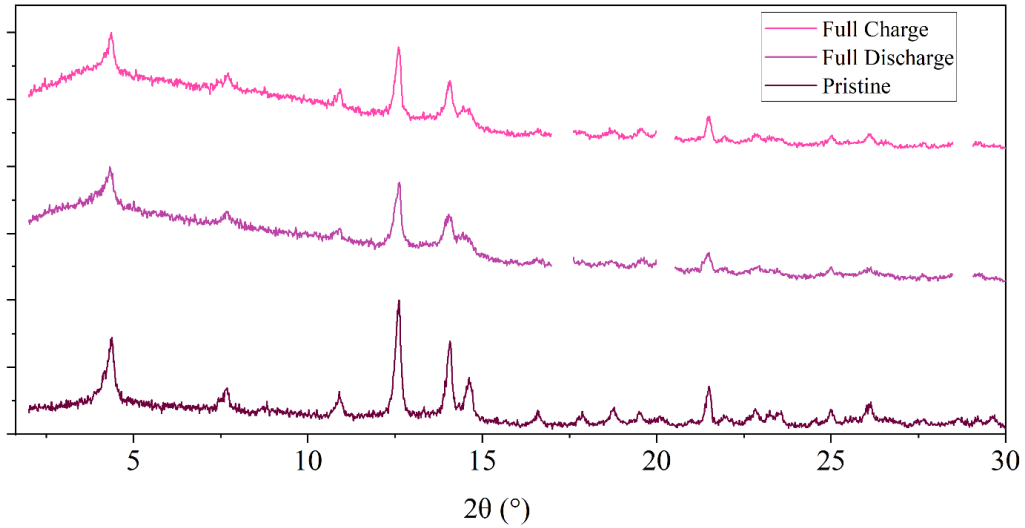

Fig. S27 Ex-situ XRD of KTNO/rGO-8. Al peaks removed for clarity

Equation S1:

$$D = \frac{4}{9\pi} \cdot \left( \frac{E_4 - E_0}{E_2 - E_0} \right)^2 \cdot \frac{r_p^2}{t_p}$$

Equation S2:

$$i_p = av^b$$

Equation S3:

$$i(V) = k_1v + k_2v^{1/2}$$
